# Supplementary material
Source: ML conference proceedings conference paper supplement (https://openreview.net/forum?id=A4t17y2lXa)

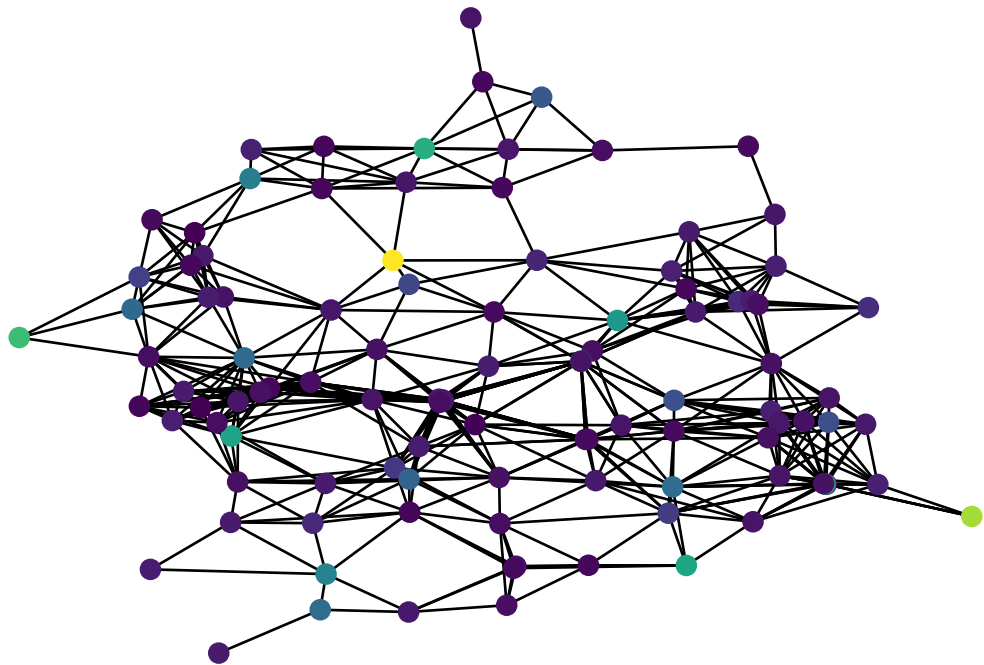

Supplement: supplementary_material [file graph_0.pdf › robust-gossip-main/data/graph_0.pdf]
